# Supplementary material for: Linking genome content to biofuel production yields: a meta-analysis of major catabolic pathways among select H2 and ethanol-producing bacteria
Source: PubMed Central journal article supplement (PMC3561251; doi:10.1186/1471-2180-12-295), 2012-12-18
Supplement: 1471-2180-12-295-S1.pdf [file 1471-2180-12-295-S1.pdf]

| 6-Phosphofructokinase Genes                                          |                 |         |         |                       |
|----------------------------------------------------------------------|-----------------|---------|---------|-----------------------|
| Organism                                                             | Locus Tag       | AA #104 | AA #124 | ATP or PPi Dependence |
| <i>Bacillus cereus</i> ATCC 14579                                    | BC4600          | G       | G       | ATP                   |
| <i>Caldanaerobacter subterraneus</i> subsp. <i>tengcongensis</i> MB4 | TTE1816         | G       | G       | ATP                   |
| <i>Ethanoligenens harbinense</i> YUAN-3T, DSM 18485                  | Ethha_1347      | G       | G       | ATP                   |
| <i>Geobacillus thermoglucosidasius</i> C56-YS93                      | Geoth_0897      | G       | G       | ATP                   |
| <i>P. furiosus</i> DSM 3638                                          | PF0312          | S       | E       | ATP                   |
|                                                                      | PF1784          | L       | F       | ATP                   |
| <i>Thermococcus kodakaraensis</i> KOD1                               | TK0376          | L       | F       | ATP                   |
|                                                                      | TK1110          | S       | E       | ATP                   |
| <i>Thermotoga maritima</i> MSB8                                      | TM0209          | G       | A       | ATP                   |
|                                                                      | TM0289          | D       | K       | PPi                   |
| <i>Thermotoga neapolitana</i> DSM 4359                               | CTN_0395        | D       | K       | PPi                   |
|                                                                      | CTN_0476        | G       | A       | ATP                   |
| <i>Thermotoga petrophila</i> RKU-1                                   | Tpet_0623       | D       | K       | PPi                   |
|                                                                      | Tpet_0715       | G       | A       | ATP                   |
| <i>Caldicellulosiruptor bescii</i> DSM 6725                          | Athe_1265       | G       | G       | ATP                   |
|                                                                      | Athe_1824       | D       | K       | PPi                   |
| <i>Caldicellulosiruptor saccharolyticus</i> DSM 8903                 | Csac_1830       | G       | G       | ATP                   |
|                                                                      | Csac_2366       | D       | K       | PPi                   |
| <i>Clostridium cellulolyticum</i> H10                                | Ccel_2223       | D       | K       | PPi                   |
|                                                                      | Ccel_2612       | G       | G       | ATP                   |
| <i>Clostridium phytofermentans</i> ISDg                              | Cphy_0336       | G       | G       | ATP                   |
|                                                                      | Cphy_3345       | D       | K       | PPi                   |
| <i>Clostridium thermocellum</i> ATCC 27405                           | Cthe_0347       | D       | K       | PPi                   |
|                                                                      | Cthe_1261       | G       | G       | ATP                   |
| <i>Clostridium thermocellum</i> DSM 4150                             | CtherDRAFT_1670 | G       | G       | ATP                   |
| <i>Thermoanaerobacter pseudethanolicus</i> 39E                       | Teth39_0494     | D       | K       | PPi                   |
|                                                                      | Teth39_0683     | G       | G       | ATP                   |
