# Supplementary material for: Linking genome content to biofuel production yields: a meta-analysis of major catabolic pathways among select H2 and ethanol-producing bacteria
Source: PubMed Central journal article supplement (PMC3561251; doi:10.1186/1471-2180-12-295), 2012-12-18

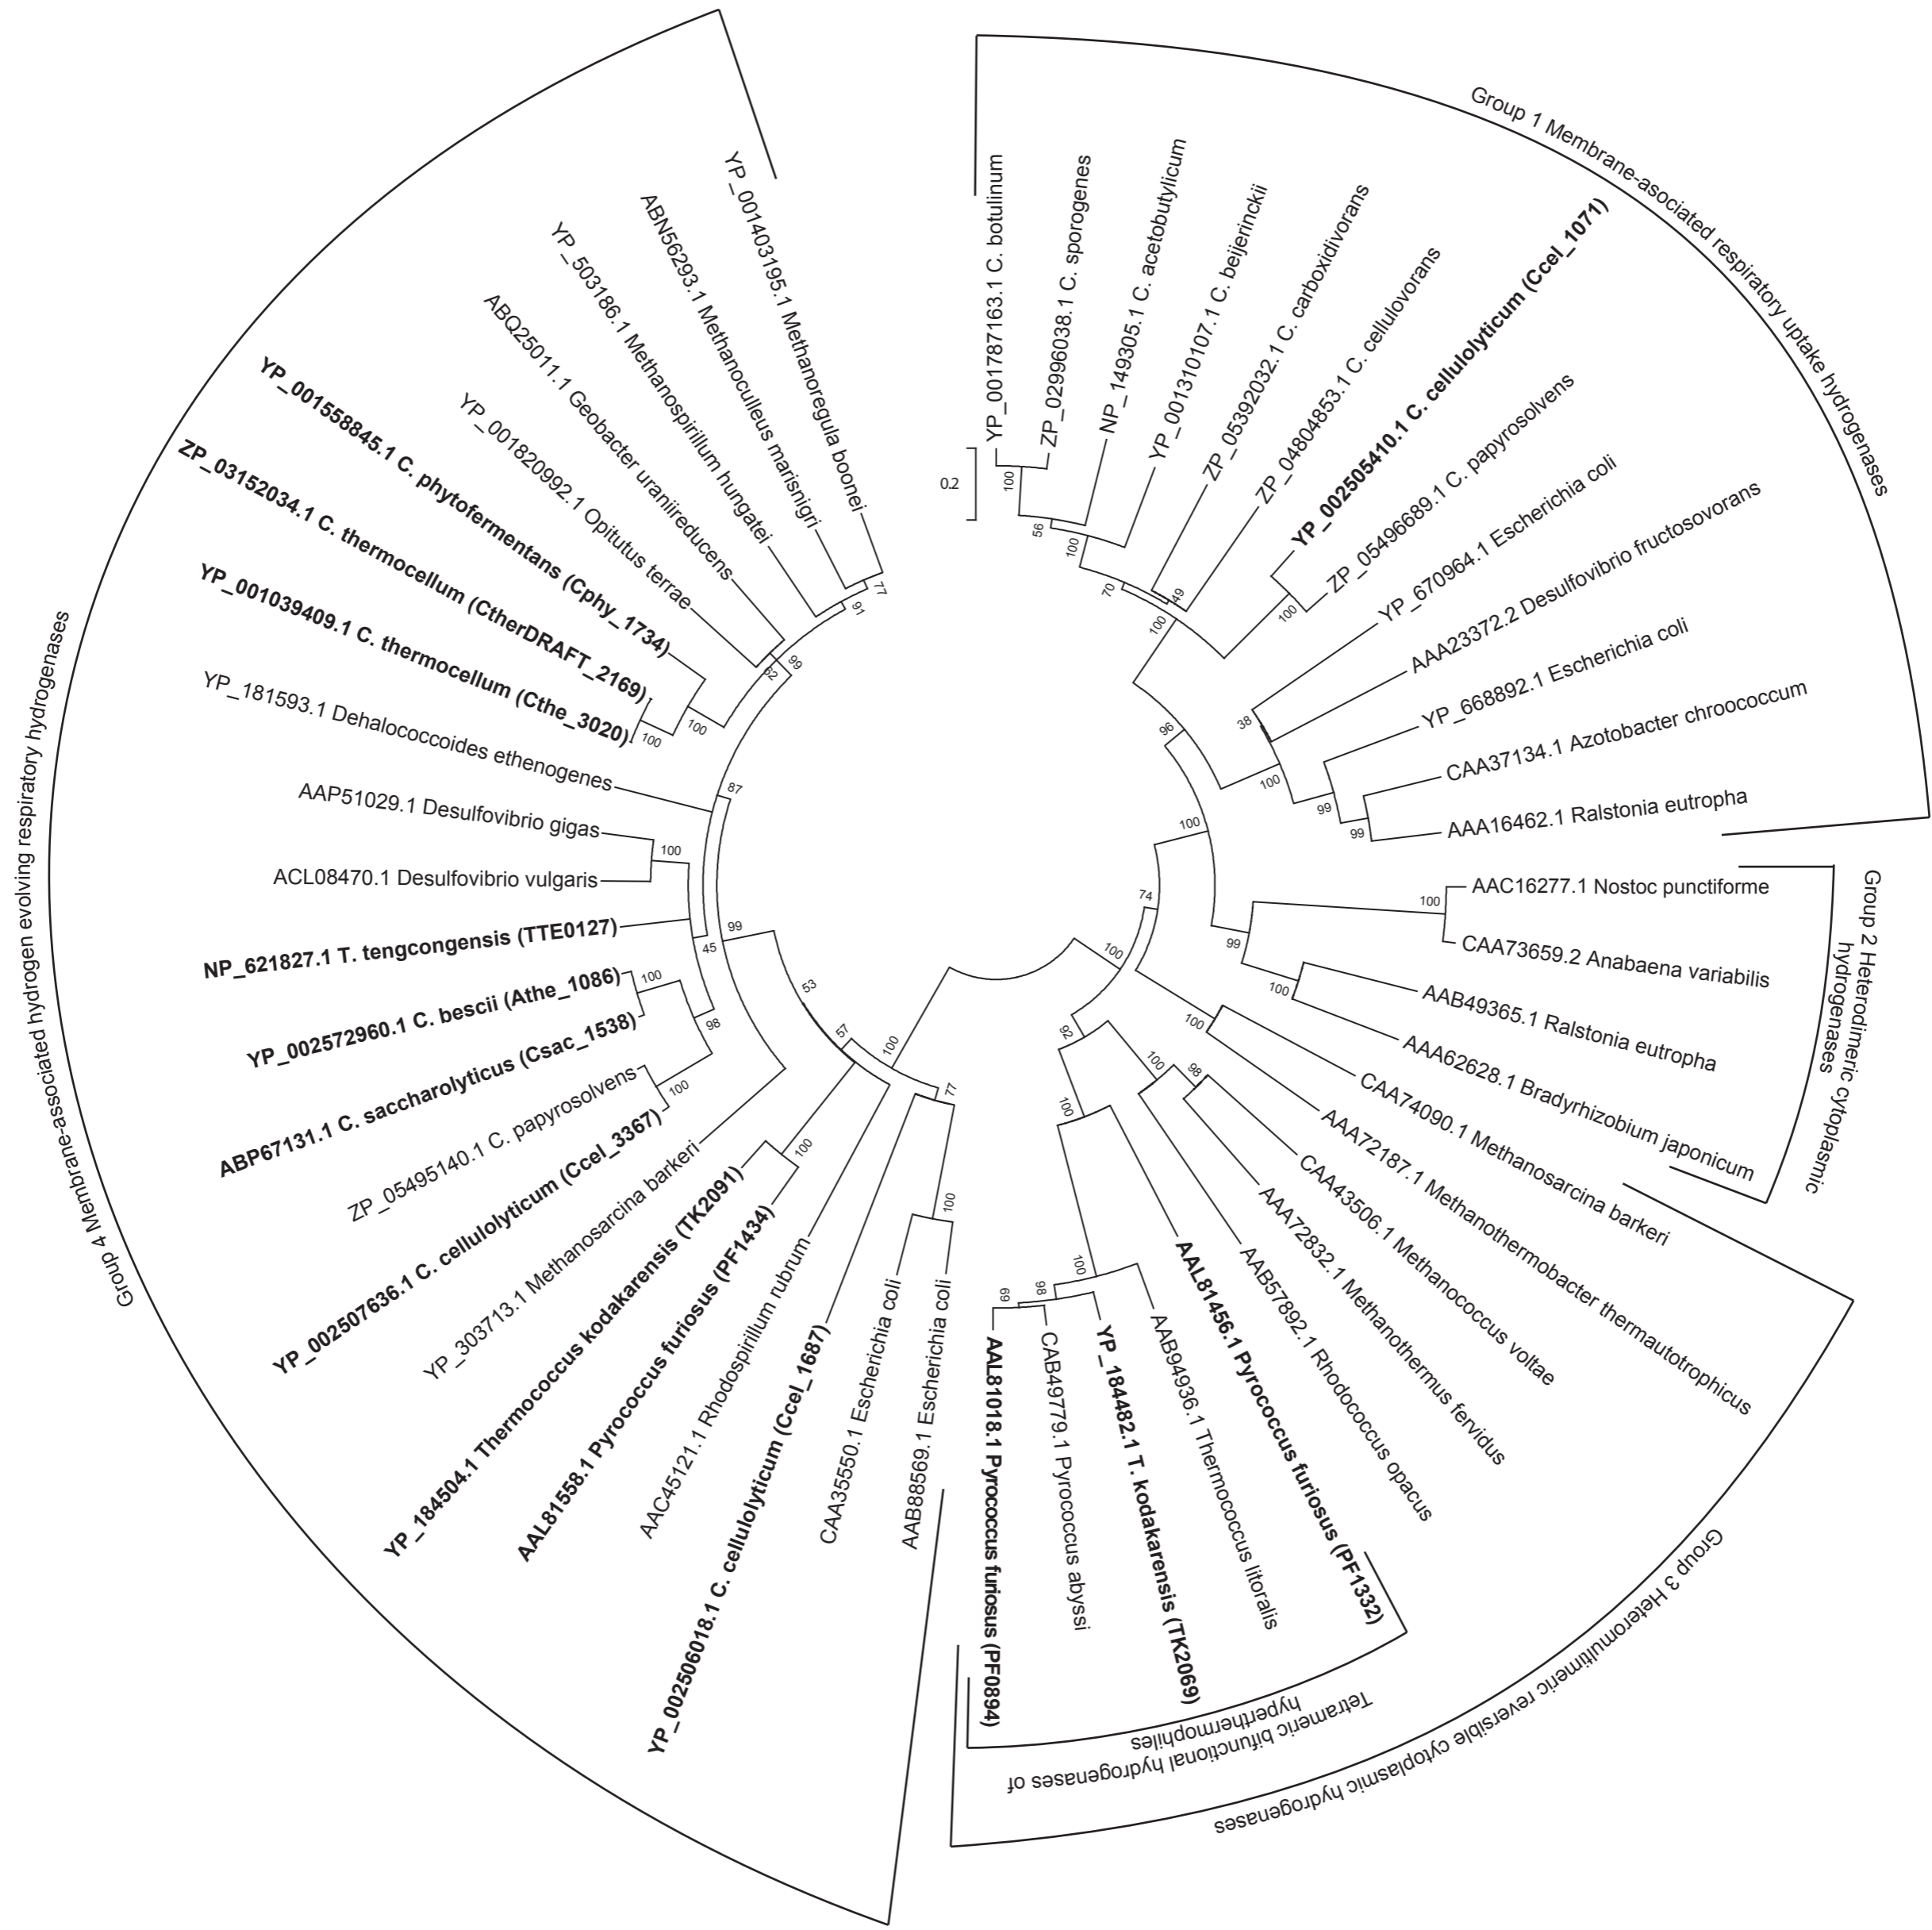

Supplement: 1471-2180-12-295-S2.pdf [file 1471-2180-12-295-S2.pdf]
